# Supplementary material
Source: publisher figshare collection journal article supplement (https://tandf.figshare.com/ndownloader/files/13576193)
Supplement: Supplementary file 1 [file 13576193]

| Farm Code |
| --- |
| Recorder Code |
| Date |

|  | | |
| --- | --- | --- |
|  | |
|  | **1** | **4** |

**ADDITIONAL SURVEY**

**2014**

[
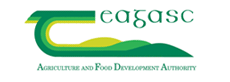
](http://tnet.teagasc.net/)

**Agricultural Economics and Farm Survey Dept.**

**Q1: Recent CAP changes may impact on farmer’s production plans. We are trying to measure the impact of CAP changes on farm production and how you will react in the years ahead.**

| **Hectares** | **30 June 2014** | | **30 June 2015 (plan)** | | **30 June 2017**  **(plan)** | | |
| --- | --- | --- | --- | --- | --- | --- | --- |
| Land Owned |  |  |  |  | 1=Increase |  |  |
| Land Rented-In |  |  |  |  | 2=Decrease |  |  |
| Land Rented-Out |  |  |  |  | 3=No change |  |  |

| **Livestock (Head)** | **30 June 2014** | | | | **30 June 2015**  **(plan)** | | | | **30 June 2017**  **(plan)** | | | |
| --- | --- | --- | --- | --- | --- | --- | --- | --- | --- | --- | --- | --- |
| Dairy Cows |  | | |  |  | | |  |  | | |  |
| Suckler Cows |  | | |  |  | | |  |  | | |  |
|  | **Autumn 2014** | | |  | **Autumn 2015**  **(plan)** | | |  | **Autumn 2017**  **(plan)** | | | |
| Ewes to Ram |  | | |  |  | | |  |  | | |  |
| Lowland= 1; Hill = 2; |  |  |  |  |  |  |  |  |  |  |  |  |
| **Cereals (ha)** |  |  |  |  |  |  |  |  |  |  |  |  |
| Cash Crops |  | | |  |  | | |  |  | | |  |
| Forage Crops |  | | |  |  | | |  |  | | |  |
| *Of which* |  | Total Area | | Under Film | |  | |  |  |  | |  |
| Maize |  |  | |  |  |  | |  |  |  | |  |
|  |  |  |  |  |  |  |  |  |  |  |  |  |
| Forestry |  |  | |  |  |  | |  |  |  | |  |

| **Q2(a) Do you use a “Zero Grazer”?**  **Q2(b):Do you use a Zero Grazer?** | | | | | | | | | |
| --- | --- | --- | --- | --- | --- | --- | --- | --- | --- |
| *1= Yes; 2 = No* | | | | | | | |  | |
| If **YES** for how many weeks is it used? | | | | | | | |  | |
| **Q2(b): Area (hectares) of grass silage harvested during 2013 by harvester type** | | | | | | | | | |
| Year |  | Precision-chop | Double-chop | Single-chop | Forage wagon | Large round bale | Large square bale | | Other |
| 2013 | Ground cut once |  |  |  |  |  |  | |  |
| 2013 | Ground cut twice |  |  |  |  |  |  | |  |
| 2013 | Ground cut three times + |  |  |  |  |  |  | |  |

**Q2(c): Number of bales of silage made in 2013**

| Year | Colour of plastic film used for wrapping | | | | Bale hold type | | |
| --- | --- | --- | --- | --- | --- | --- | --- |
| Black | Green | White | Other | Twine | Netting | Barrel film |
| 2013 |  |  |  |  |  |  |  |

| **Q2(d): Additives used in 2013 (hectares treated)**  If no additive was used, enter the area harvested on the first line opposite ‘No additive’ | | | | | | |
| --- | --- | --- | --- | --- | --- | --- |
|  | Conventional grass silage | Baled grass silage | Maize silage | Whole crop cereal silage | Arable silage | High moisture grain |
| No additive |  |  |  |  |  |  |
| Molasses |  |  |  |  |  |  |
| Dry feeds |  |  |  |  |  |  |
| Biological |  |  |  |  |  |  |
| Salts |  |  |  |  |  |  |
| Acid |  |  |  |  |  |  |
| Other |  |  |  |  |  |  |

**Q3: GHG Emissions from Agriculture**

**Q3(a): “Man-made Greenhouse Gas Emissions contribute to global climate change and changing weather patterns”**

| *1 = Agree with this statement; 2 = Disagree with this statement;3 = Don’t Know* |  |
| --- | --- |

**Q3(b): Have you received any agri-environmental advice or training and if not would you be willing to receive some?**

| **1 =** Yes I have | **2 =** No I have not, but I would like to receive agri-environmental training | **3 =** No I have not and I do not want to receive agri-environmental training |  |
| --- | --- | --- | --- |

**Q3(c): How much of an increase in your production costs would you be willing to incur in order to reduce your farm’s Greenhouse Gas Emissions by 5%?**

| 1 = No increase; 2 = Between 0% and 5%; 3 = Between 5% and 10%;  4 = Between 10% and 20%; 5 = More than 20% |  |
| --- | --- |

**Q3(d): It is important to me that I reduce the Greenhouse Gas Emissions of my farm *(Tick box)***

| Strongly Disagree | Disagree | Agree | Strongly Agree | Don’t know |
| --- | --- | --- | --- | --- |
|  |  |  |  |  |

**Q3(e): Do you expect climate change to have a negative impact on your production decisions?**

*(Tick one answer only)*

| 1 = Yes but only in the long term (i.e. not for 20 years or more) |  |
| --- | --- |
| 2 = Yes in the medium term (i.e. within the next 5 years) |  |
| 3 = Yes we are currently seeing the impact |  |
| 4 = No I do not expect any impact at all |  |
| 5 = No I expect a positive impact |  |
| 6 = Don’t know |  |

**Q3(f): The activities listed below are important causes of Irish Agricultural Greenhouse Gas Emissions.** *Circle one answer*

|  |  | **Strongly disagree** | | **Don’t know** | **Strongly agree** | |
| --- | --- | --- | --- | --- | --- | --- |
| 1 | Livestock production | 1 | 2 | 3 | 4 | 5 |
| 2 | Artificial fertiliser application | 1 | 2 | 3 | 4 | 5 |
| 3 | Tilling of land | 1 | 2 | 3 | 4 | 5 |
| 4 | Clearing of forests | 1 | 2 | 3 | 4 | 5 |
| 5 | Electricity and fuel use on the farm | 1 | 2 | 3 | 4 | 5 |

**Q3(g): Would you be interested in using an advisory tool that quantifies the GHG emission from your farm?**

| *1 = Yes; 2 = No; 3 = Don’t Know* |  |
| --- | --- |

**Q3(h): Would you use an advisory tool that would show the potential reduction in GHG emissions from the adoption of new technologies on your farm?**

| *1 = Yes; 2 = No; 3 = Don’t Know* |  |
| --- | --- |

**Q3(i): Do you use information from social networking tools (such as discussion boards, blogs, twitter, etc.) to help you make farm management decisions?**

| *1 = Yes, frequently; 2 = Yes, but infrequently; 3 = No* |  |
| --- | --- |

**Q3(j): When you retire, what do you expect to happen with your farm?**

| *1 = Continue to be farmed by a family member; 2 = Continue to be owned by a family member but not farmed by a family member; 3 = No longer owned by the family* |  |
| --- | --- |

**Q4(a): Access to credit – all farms**

| In 2013 did you seek loan finance? *1 = Yes, 2 = No* |  |
| --- | --- |
| **If YES** how successful were you in obtaining loan finance from each of the following:- |  |
| Finance Company *1 = Successful; 2 = Partially successful; 3 = Unsuccessful; 4 = n/a* |  |
| Banks *1 = Successful; 2 = Partially successful; 3 = Unsuccessful; 4 = n/a* |  |
| Credit Unions *1 = Successful; 2 = Partially successful; 3 = Unsuccessful; 4 = n/a* |  |
| Family *1 = Successful; 2 = Partially successful; 3 = Unsuccessful; 4 = n/a* |  |
| Other Finance Source *(specify) __________________________________________________* |  |

**Q4(b): Funding Investment Sources**

| Do you plan to invest in additional land, machinery, buildings or livestock over the next 1-3 years: *1 = Yes; 2 = No* |  |
| --- | --- |
| **If YES** how do you intend to finance the investment: |  |
| Loan Finance  *1 = Fully fund investment; 2 = Partially fund investment; 3 = Don’t intend to use this source* |  |
| Personal savings / cash flow  *1 = Fully fund investment; 2 = Partially fund investment; 3 = Don’t intend to use this source* |  |
| Capital Grant aid  *1 = Fully fund investment; 2 = Partially fund investment; 3 = Don’t intend to use this source* |  |
| Other Finance Source *(specify) __________________________________________________* |  |
